# Supplementary material
Source: PubMed Central journal article supplement (PMC6218864)
Supplement: ASN.2018030333SupplementaryData1.pdf [file ASN.2018030333SupplementaryData1.pdf]

## **Supplemental Information**

### **Renal COP9 signalosome deficiency alters CUL3-KLHL3-WNK signaling pathway**

Ryan J. Cornelius, Jinge Si, Catherina A. Cuevas, Jonathan W. Nelson, Brittany D.K. Gratrek, Ruggero Pardi, Chao-Ling Yang, David H. Ellison

#### **Table of Contents**

**Table S1**

**Figure S1**

**Figure S2**

**Figure S3**

**Figure S4**

**Table S1.** Antibodies used for Western blot and immunofluorescent staining

| <i>Target</i>          | <i>Figure</i> | <i>Source</i>   | <i>ID</i>       | <i>App</i> | <i>Dilution</i>           |
|------------------------|---------------|-----------------|-----------------|------------|---------------------------|
| JAB1                   | 1             | Santa Cruz      | FL-334, SC-9074 | IF,<br>WB  | 1:50, 1h<br>1:1,000, o/n  |
| Calbindin D-28         | 1, S1, S2     | Swant           | CB300           | IF         | 1:50-1:200 1h             |
| NHE3                   | 1             | Chemicon        | MAB3134         | IF         | 1:50, 1h                  |
| CUL3                   | 2             | Cell Signalling | 2759            | WB         | 1:1,000, o/n              |
| NEDD8                  | 2             | Cell Signaling  | 19E3, 2754      | WB         | 1:1,000, o/n              |
| KLHL3*                 | 3             | Proteintech     | 16951-1-AP      | WB,<br>IF  | 1:500, o/n<br>1:50, o/n   |
| Parvalbumin            | 3             | Swant           | GP72            | IF         | 1:50, 1h                  |
| WNK4                   | 4, S1         | Ellison Lab     |                 | WB,<br>IF  | 1:1,000, 1h,<br>1:500, 1h |
| pWNK4 <sup>S1196</sup> | 4             | Ellision Lab    |                 | WB         | 1:500, o/n                |
| WNK1                   | 4             | Ellison Lab     |                 | WB         | 1:1,000, 1h               |
| SPAK                   | 4, S2         | Delpire Lab     |                 | WB,<br>IF  | 1:5,000, o/n<br>1:200 1h  |
| OSR1                   | 4, S2         | Delpire Lab     |                 | WB,<br>IF  | 1:5,000, o/n<br>1:200 1h  |
| pSPAK/pOSR1            | 4             | Millipore       | 07-2273         | WB         | 1:1,000, o/n              |
| NCC                    | 5             | Ellison Lab     |                 | WB         | 1:6,000, 1h               |
| pNCC <sup>T53</sup>    | 5             | Ellison Lab     |                 | WB         | 1:2,000, o/n              |
| Keap1                  | 3             | Millipore       | MABS514, c144   | WB         | 1:1,000, o/n              |
| NKCC2                  | 6             | Bachmann Lab    |                 | WB         | 1:1,000, o/n              |
| pNKCC2                 | 6             | Bachmann Lab    |                 | WB         | 1:1,000, o/n              |
| AQP2                   | 6             | Santa Cruz      | SC-9882         | WB         | 1:1,000, 1h               |
| Cyclin E               | 6             | Roberts Lab     |                 | WB         | 1:500, 1h                 |
| HA                     | 5C            | Covance         | HA1.1, MMS-101P | WB         | 1:1,000, 1h               |

Abbreviations: App, application; WB, Western blot; IF, immunofluorescence; o/n, overnight.

\* KLHL3 antibody was incubated in Can Get Signal for WB as stated in methods section.

**Figure S1**

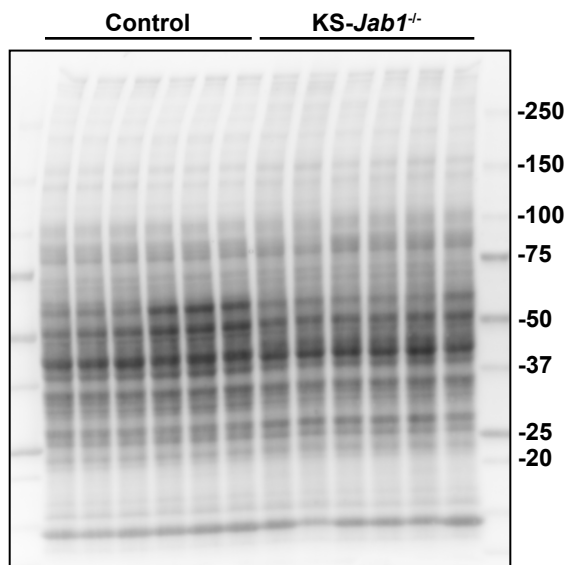

**Figure S1. Stain-free gel imaging.** Image of a stain-free gel membrane, shown here as an example of stain-free imaging used for loading control.

Figure S2

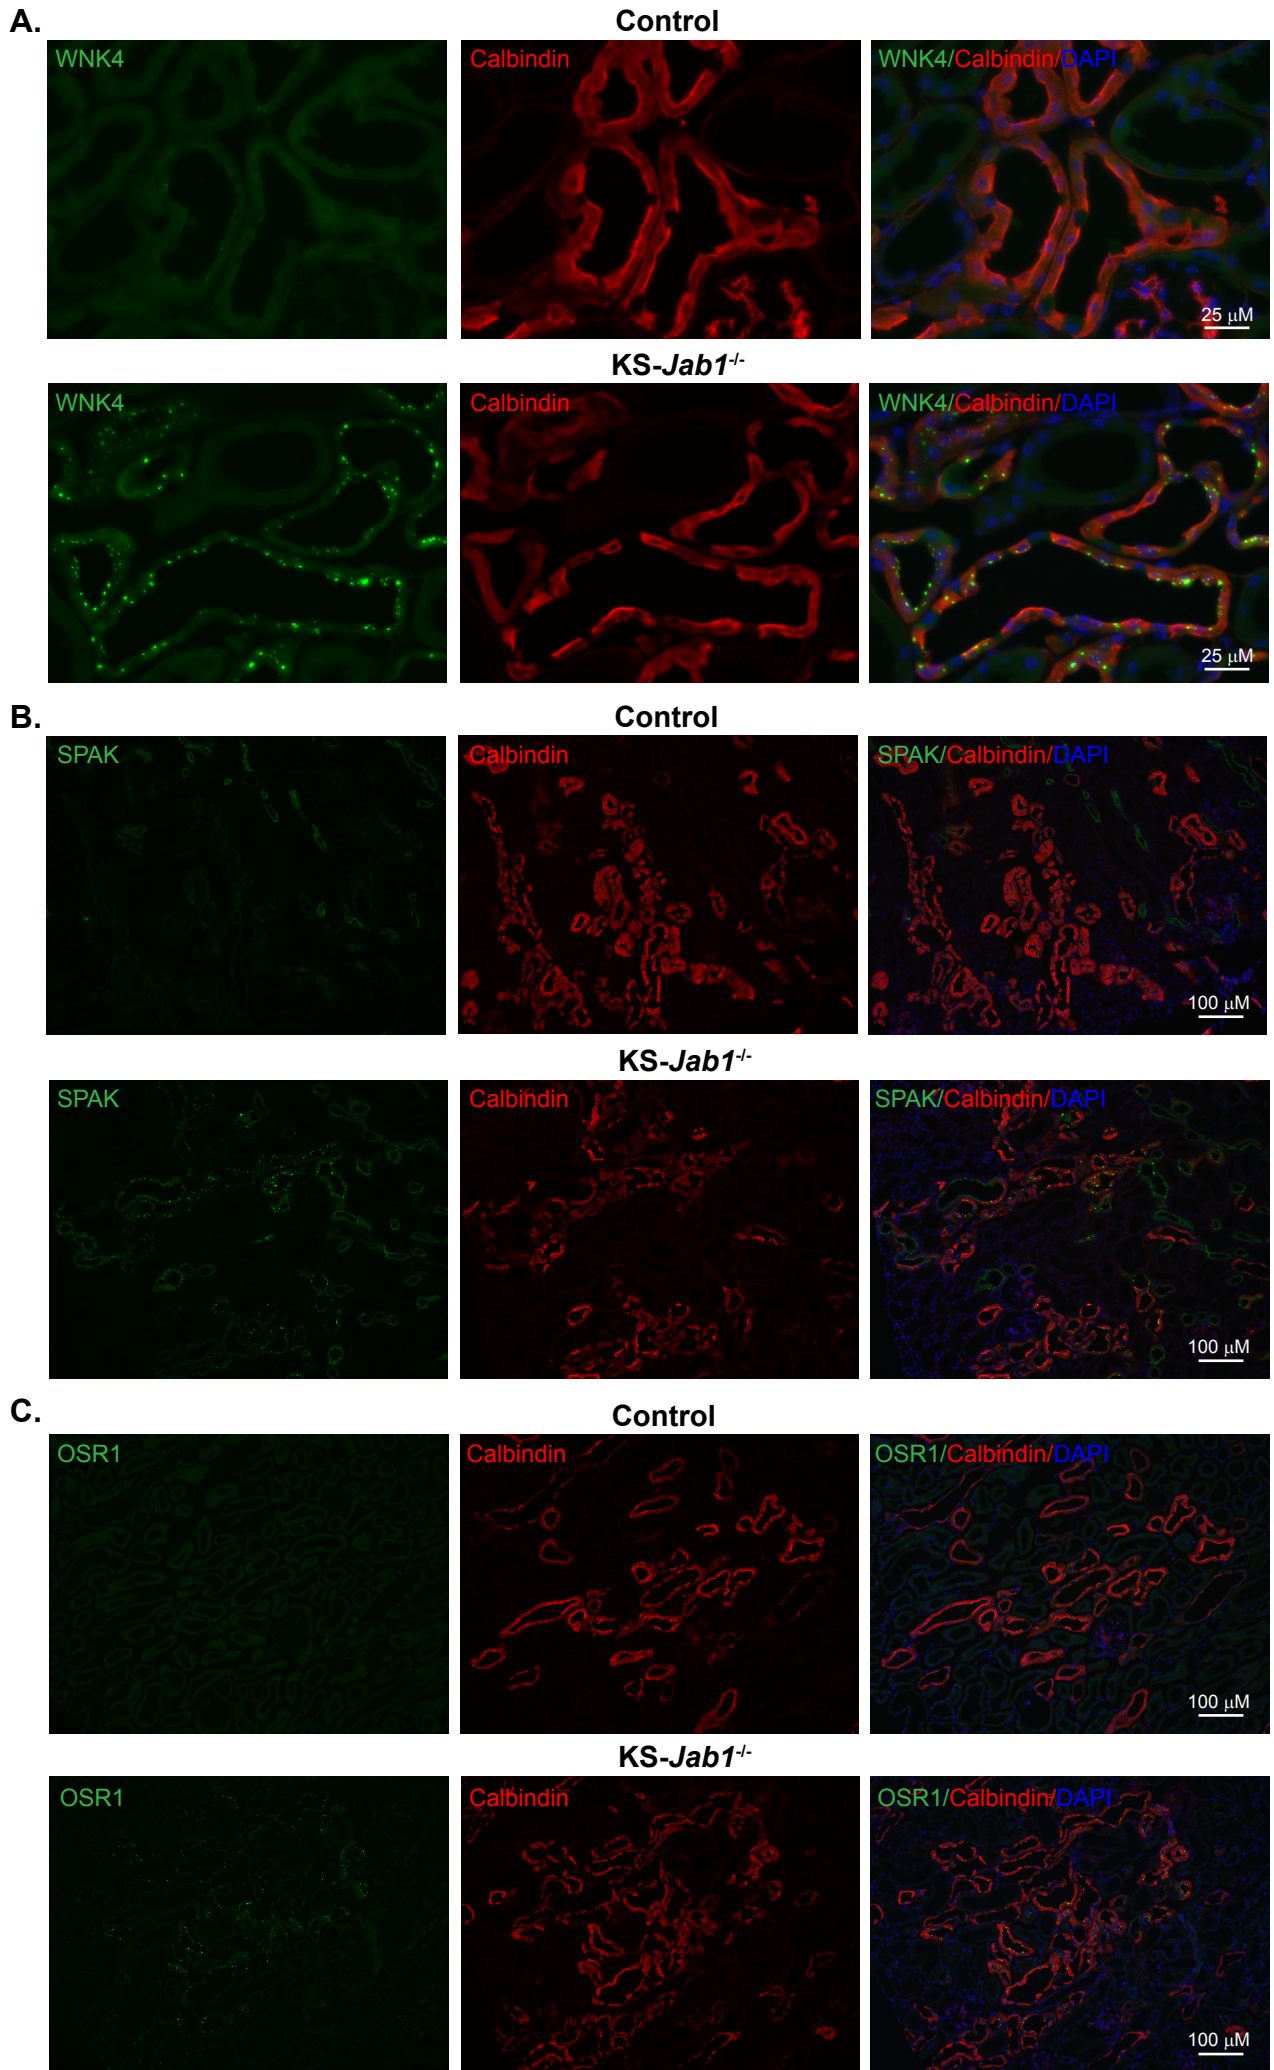

**Figure S2. Co-immunofluorescent staining of WNK4, SPAK, and OSR1 with calbindin.**

Immunofluorescent staining of kidney cortex sections from control and *KS-Jab1<sup>-/-</sup>* mice. WNK4 (A) SPAK (B) and OSR1 (C) localization was examined in kidney cortex by co-staining with the distal nephron marker calbindin. There was low abundance of WNK4, SPAK and OSR1 staining in control mice relative to *KS-Jab1<sup>-/-</sup>* mice. Staining of *KS-Jab1<sup>-/-</sup>* mice kidney sections showed protein translocated into puncta in calbindin-positive cells.

**Figure S3**

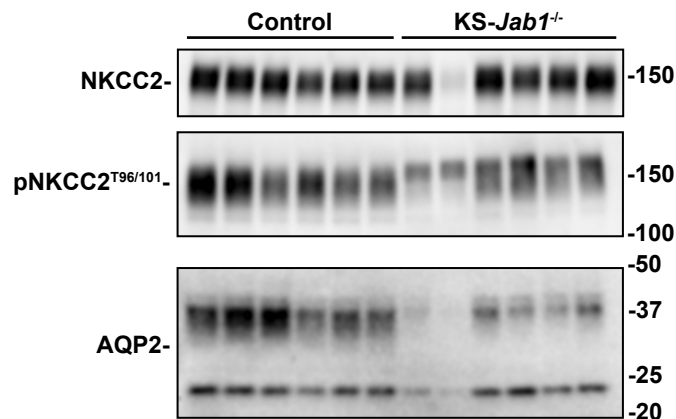

**Figure S3. Effects of nephron-specific *Jab1* deletion on NKCC2, pNKCC2, and AQP2 protein abundance.**

Western blot of whole-kidney lysates from control and *KS-Jab1<sup>-/-</sup>* mice. Immunoblotting was performed with antibodies against the Na-K-2Cl cotransporter (NKCC2), phosphorylated NKCC2 at threonine 96/101 (pNKCC2<sup>T96/101</sup>), or aquaporin 2 (AQP2). There was no difference in NKCC2 or pNKCC2<sup>T96/101</sup> protein abundance between *KS-Jab1<sup>-/-</sup>* and control mice. AQP2 abundance was lower in *KS-Jab1<sup>-/-</sup>* mice.

**Figure S4**

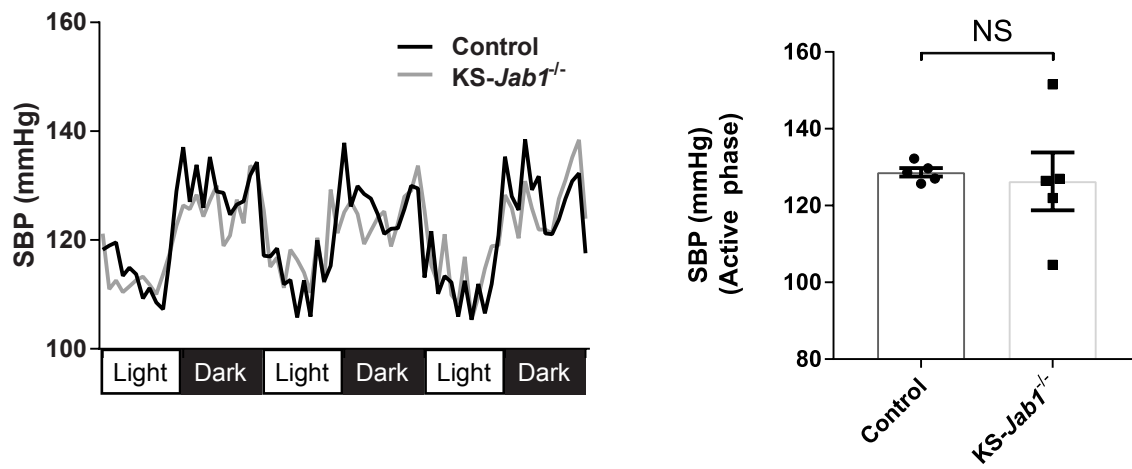

**Figure S4. Effects of nephron-specific *Jab1* deletion on blood pressure.** A) Radiotelemetry was used to measure systolic blood pressure in control and *KS-Jab1*<sup>-/-</sup> mice. The tracing (left), using 1 h average values, and the analysis of the mean of the 1 h averages of three dark periods (right) showed that there was no difference between *KS-Jab1*<sup>-/-</sup> mice and control mice. Data represent individual values as well as mean  $\pm$  SEM (control,  $n = 5$ ; *KS-Jab1*<sup>-/-</sup>,  $n = 5$ ).
